# Supplementary material
Source: publisher site journal article supplement (http://www.spandidos-publications.com/6225/downloadSupplementary)
Supplement: Supplementary file 1 [file downloadSupplementary]

## Sheet: Sheet1
Table SIII. Primer sequences
Species	Gene symbol	Forward primer (5'-3')	Reverse primer (5'-3')
Human	FN1	ACAACACCGAGGTGACTGAGAC	GGACACAACGATGCTTCCTGAG
Human	SPP1	CGAGGTGATAGTGTGGTTTATGG	GCACCATTCAACTCCTCGCTTTC
Human	NOS3	TGATGGCGAAGCGAGTGAAG	ACTCATCCATACACAGGACCC
Human	HMOX1	AAGACTGCGTTCCTGCTCAAC	AAAGCCCTACAGCAACTGTCG
Human	LEP	TGCCTTCCAGAAACGTGATCC	CTCTGTGGAGTAGCCTGAAGC
Human	CXCL12	CTCAACACTCCAAACTGTGCCC	CTCCAGGTACTCCTGAATCCAC
Human	FOS	GGGGCAAGGTGGAACAGTTAT	CCGCTTGGAGTGTATCAGTCA
Human	CXCR4	ACTACACCGAGGAAATGGGCT	CCCACAATGCCAGTTAAGAAGA
Human	IL6	ACTCACCTCTTCAGAACGAATTG	CCATCTTTGGAAGGTTCAGGTTG
Human	ADIPOQ	GGCTTTCCGGGAATCCAAGG	TGGGGATAGTAACGTAAGTCTCC
Human	ACTB	TCTCCCAAGTCCACACAGG	GGCACGAAGGCTCATCA
